# Supplementary material for: Investigating the sign of stratocumulus adjustments to aerosols in the ICON global storm-resolving model
Source: Copernicus journal article supplement (doi:10.5194/acp-24-8653-2024), 2024-08-06
Supplement: Supplementary file 1 [file acp-24-8653-2024-supplement.pdf]

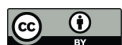

*Supplement of*

## **Investigating the sign of stratocumulus adjustments to aerosols in the ICON global storm-resolving model**

**Emilie Fons et al.**

*Correspondence to:* Emilie Fons ([emilie.fons@env.ethz.ch](mailto:emilie.fons@env.ethz.ch))

The copyright of individual parts of the supplement might differ from the article licence.

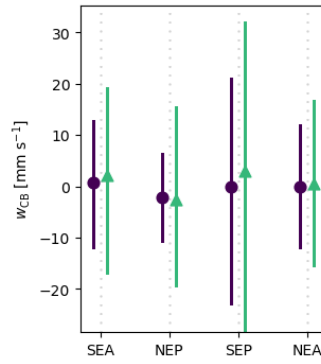

**Figure S1.** Same as Fig. 2g but showing the variance of cloud-base vertical velocity in the original 5-km ICON data instead of the coarser  $0.5^\circ \times 0.5^\circ$  resolution.

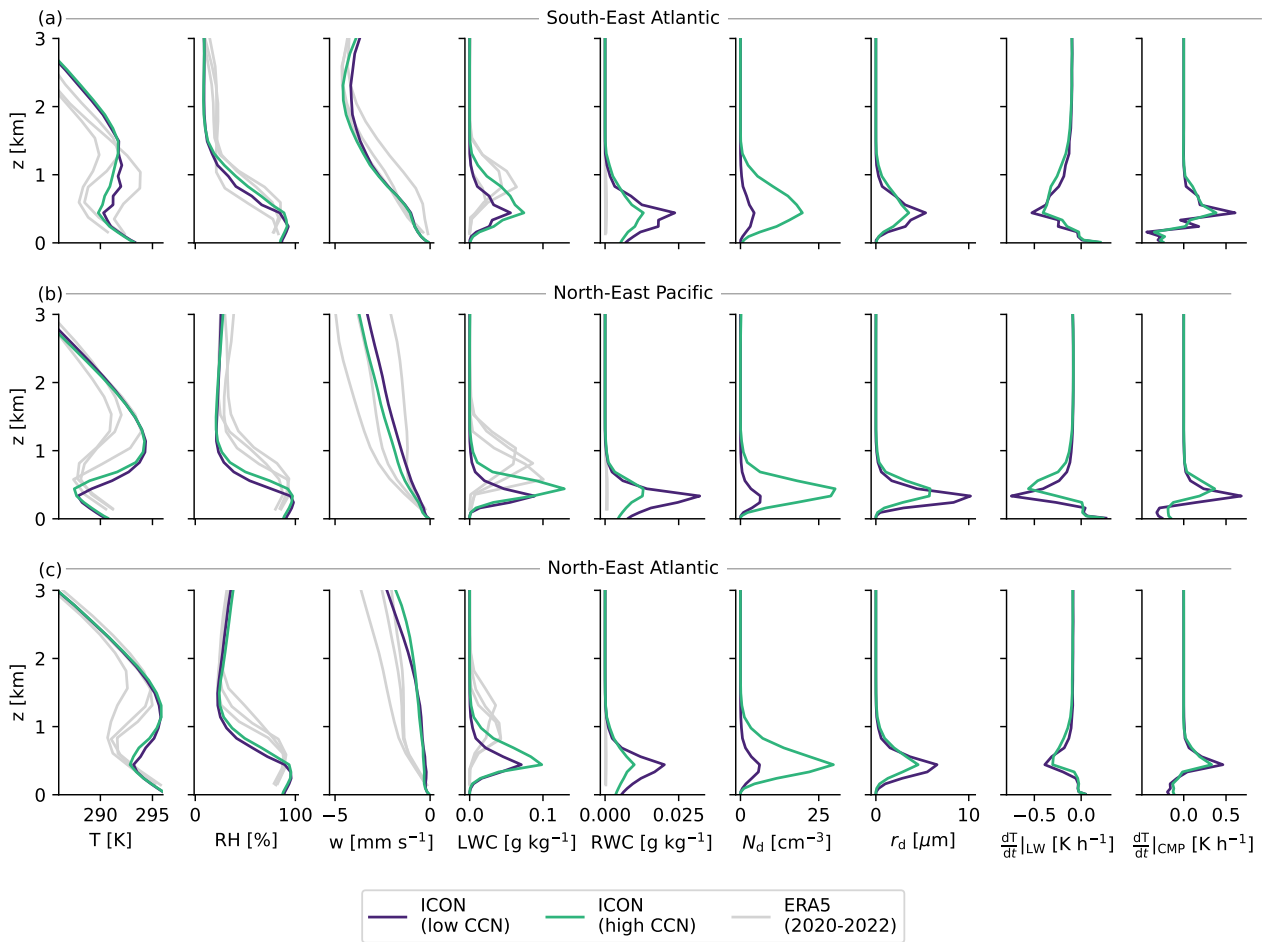

**Figure S2.** Same vertical profiles as Fig. 4 and 6 but for the SEA (a), NEP (b) and NEA (c) regions.

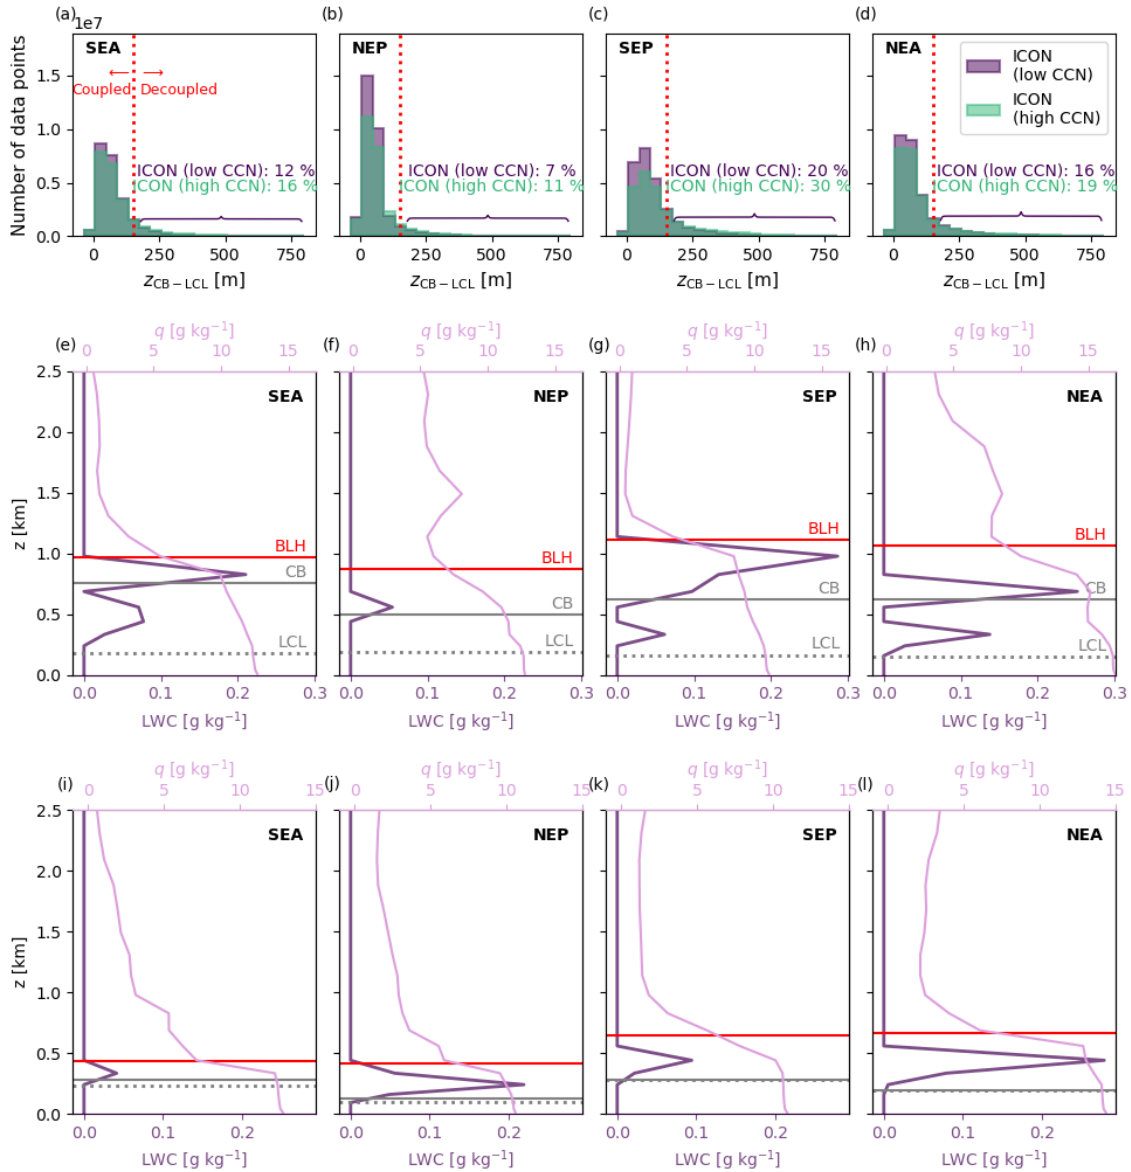

**Figure S3.** Occurrence of boundary layer decoupling in the ICON simulations. The first row shows histograms of  $z_{CB-LCL}$ , a decoupling metric, for the (a) SEA, (b) NEP, (c) SEP and (d) NEA regions.  $z_{CB-LCL}$  is the height difference between the lifting condensation level (LCL) and the stratocumulus cloud base (CB).  $z_{CB-LCL} > 150$  m identifies decoupled boundary layer (Jones et al., 2011). Percentages of decoupled boundary layers are displayed on each figure panel above the horizontal curly bracket. The second row (e-h) show randomly picked LWC and specific humidity ( $q$ ) profiles exhibiting decoupling in the ICON (low CCN) simulation for each region. On each profile, the boundary layer height (BLH), CB and LCL are labeled. Similarly, (i-l) show randomly picked profiles for well-mixed boundary layers.

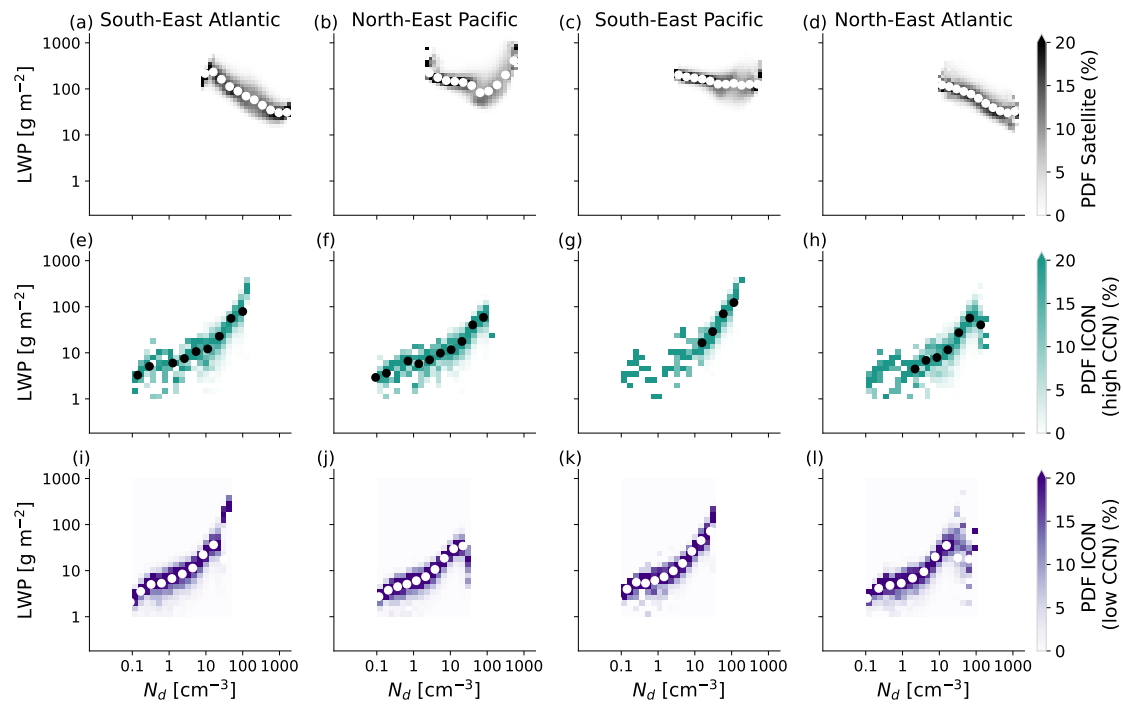

**Figure S4.** Same 2D LWP vs.  $N_d$  histograms as Fig. 5, but disaggregated by region. Subplots show the regional relationships, in the satellite data (a-d), the high CCN ICON experiment (e-h) and the low CCN ICON experiment (i-l).

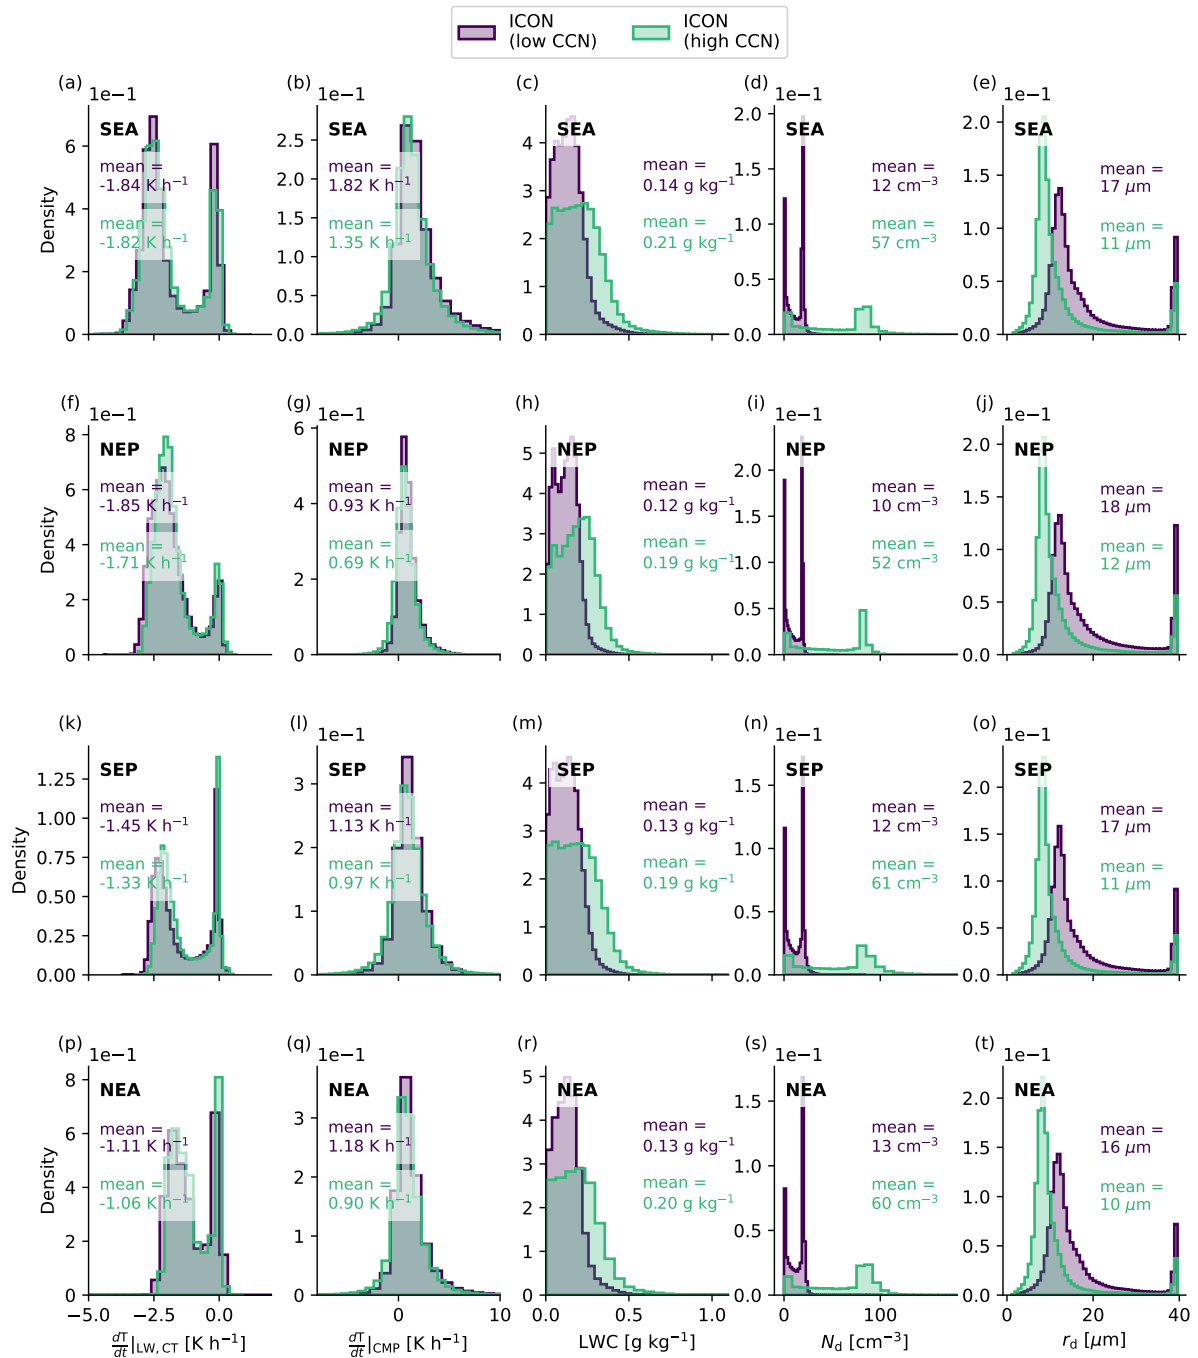

**Figure S5.** Histograms of instantaneous cloud properties for the low and high CCN ICON experiments: (a) temperature tendencies due to longwave radiation for grid cells at cloud top; (b) temperature tendencies due to the cloud microphysics scheme; (c) liquid water content averaged over the cloud depth; (d) cloud droplet number concentration averaged over the cloud depth; (e) cloud droplet radius averaged over the cloud depth. (a-e) show the five variables for the SEA region, (f-j) for the NEP region, (k-o) for the SEP region, and (p-t) for the NEA region.

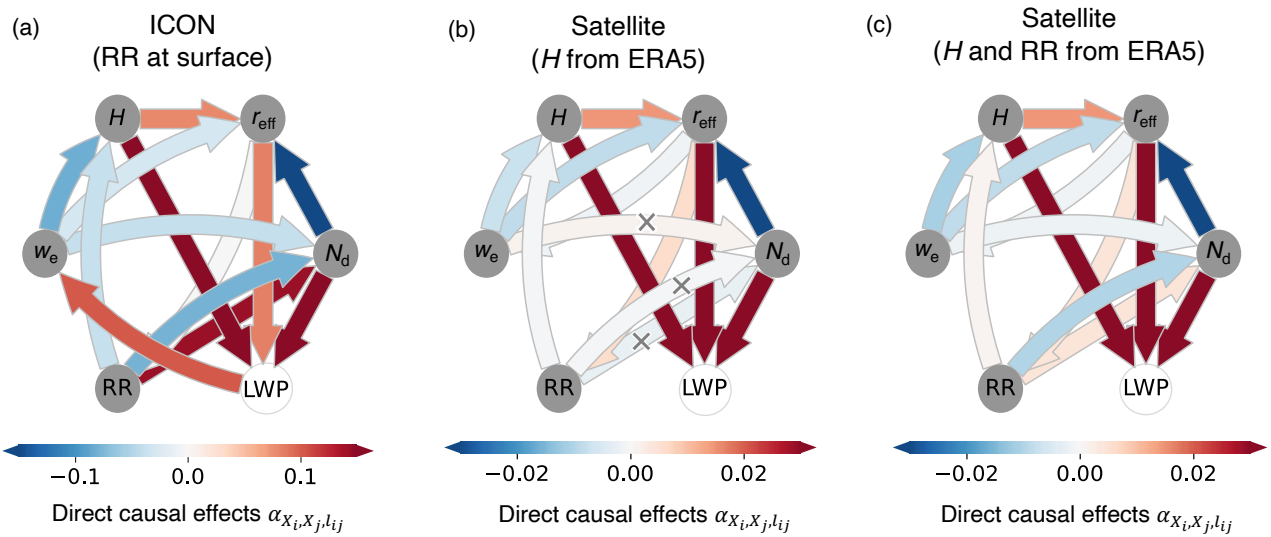

**Figure S6.** Same as Fig. 7b with different proxies for  $H$  and  $RR$ . (a)  $H$  is estimated from the satellite data, (b)  $H$  is estimated from ERA5, (c) both  $H$  and  $RR$  are taken from ERA5.

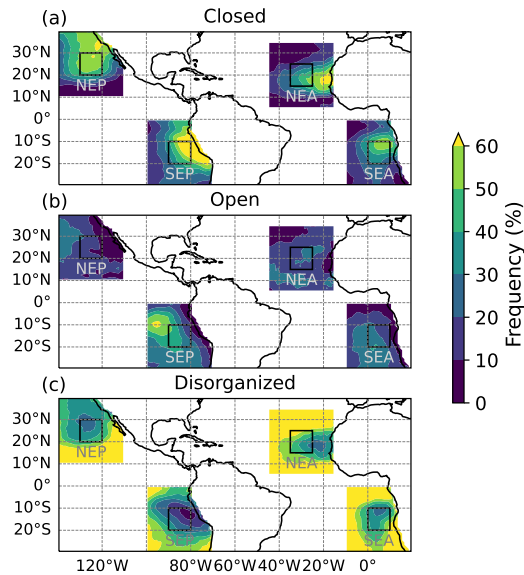

**Figure S7.** Frequencies of stratocumulus morphologies, computed using the MIDAS satellite product from McCoy et al. (2023); Eastman et al. (2023). (a) shows the frequency of the closed-cell morphology, (b) shows the frequency of the open-cell morphology and (c) shows the frequency of the disorganized morphology. Frequencies are calculated with respect to the total number of pixels identified as one of the three morphologies in a given pixel over the time period of the data set (2003 to 2018). For each year, only the 1<sup>th</sup> of July to the 9<sup>th</sup> of August are selected to match the time period of this study. Maps from cartopy (Met Office, 2010 - 2015)

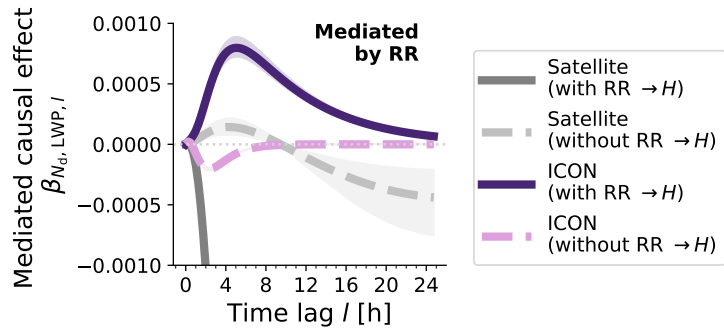

**Figure S8.** Same as Fig. 8c but comparing the graph with the arrow from RR to  $H$  to the graph without this link

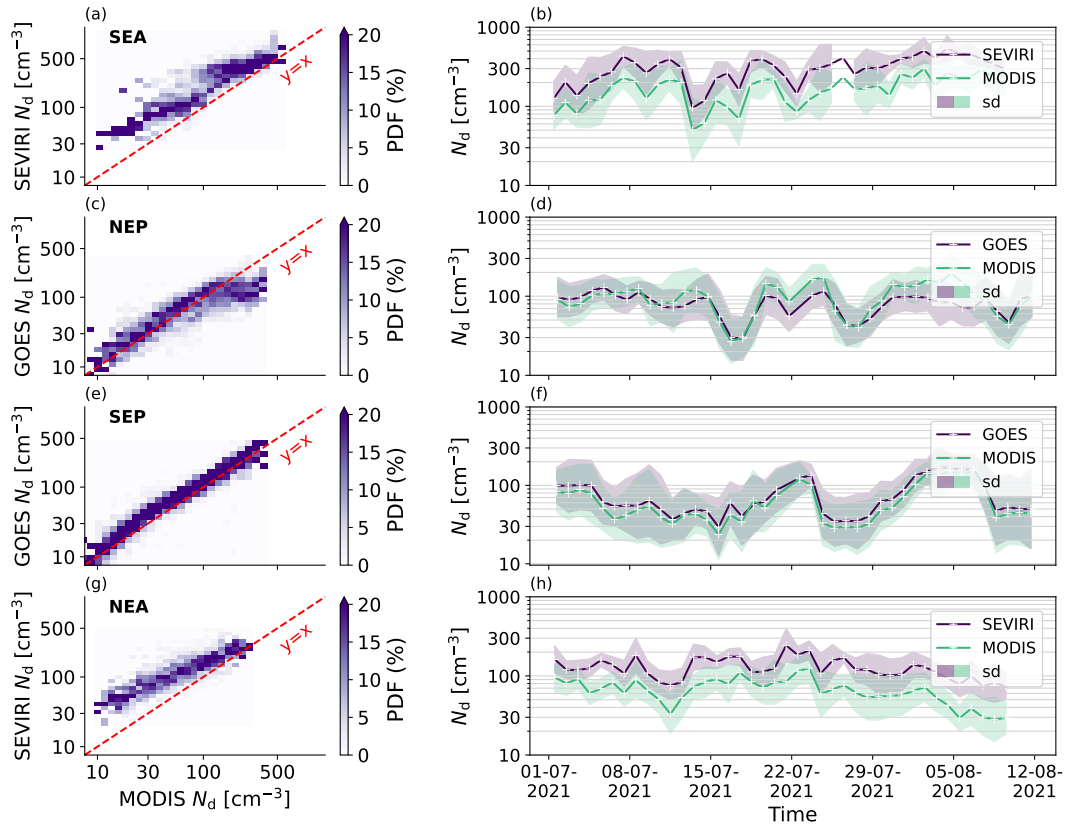

**Figure S9.**  $N_d$  retrievals for MODIS Terra vs. geostationary satellites. (a), (c), (e), (g) show 2D histograms of  $N_d$  from geostationary satellites as a function of  $N_d$  from MODIS for the four study regions. (b), (d), (f), (h) show the same comparison, but as time series, averaged over the four regions.

## References

- Eastman, R., McCoy, I. L., Schulz, H., and Wood, R.: A Survey of Radiative and Physical Properties of North Atlantic Mesoscale Cloud Morphologies from Multiple Identification Methodologies, *EGUsphere*, pp. 1–33, <https://doi.org/10.5194/egusphere-2023-2118>, 2023.
- Jones, C. R., Bretherton, C. S., and Leon, D.: Coupled vs. Decoupled Boundary Layers in VOCALS-REx, *Atmospheric Chemistry and Physics*, 11, 7143–7153, <https://doi.org/10.5194/acp-11-7143-2011>, 2011.
- McCoy, I. L., McCoy, D. T., Wood, R., Zuidema, P., and Bender, F. A.-M.: The Role of Mesoscale Cloud Morphology in the Shortwave Cloud Feedback, *Geophysical Research Letters*, 50, e2022GL101 042, <https://doi.org/10.1029/2022GL101042>, 2023.
- Met Office: Cartopy: a cartographic python library with a Matplotlib interface, Exeter, Devon, <https://scitools.org.uk/cartopy>, 2010 - 2015.
